# Supplementary material for: The fabrication of formamidinium lead iodide perovskite thin films via organic cation exchange
Source: Royal Society of Chemistry journal article supplement (doi:10.1039/c5cc09873d), 2016-01-01
Supplement: c5cc09873d1.pdf [file c5cc09873d1.pdf]

Electronic Supplementary Information

**Fabrication of formamidinium lead iodide perovskite thin films via  
organic cation exchange**

Zhongmin Zhou, Shuping Pang,<sup>\*</sup> Fuxiang Ji, Bo Zhang, Guanglei Cui <sup>\*</sup>

Qingdao Institute of Bioenergy and Bioprocess Technology, Chinese Academy of  
Sciences, Qingdao 266101, People's Republic of China.

E-mail: pangsp@qibebt.ac.cn, cuigl@qibebt.ac.cn; Tel: +86-5328066-2746

**Materials Synthesis:** Synthesis used chemicals and solvents that were reagent grade purchased from Sinopharm Chemical Reagent Co., Ltd, Sigma-Aldrich. Unless otherwise indicated, all starting materials were used without further purification.

PbI<sub>2</sub> powders were prepared by mixing KI and Pb(NO<sub>3</sub>)<sub>2</sub> (molar ratio 2:1) in water with stirring for 0.5 h at room temperature. The PbI<sub>2</sub> precipitate were filtered and then dried at 200 °C under vacuum for 2 h.

NH<sub>4</sub>PbI<sub>3</sub> powders were prepared by mixing equimolar NH<sub>4</sub>I and PbI<sub>2</sub> in N,N-dimethylformamide (DMF, 99.8%). Then the mixture was heated at 80 °C for 2 h under vacuum to remove the solvent.

CH<sub>3</sub>NH<sub>3</sub>I (or MAI) was prepared using a reported method described in the literature S1. Briefly, 20 mL methylamine (30% in ethanol) and 24 mL of hydroiodic acid (47 wt% in water) were mixed and reacted at 0 °C for 2 h while stirring under N<sub>2</sub> atmosphere. After rotary evaporation, the MAI powders was collected and washed three times with ethyl ether and dried in a vacuum oven.

The starting NH<sub>4</sub>PbI<sub>3</sub> films were deposited using one-step method. Here, a 40 wt% PbI<sub>2</sub>:NH<sub>4</sub>I (molar ratio 1:1) solution in DMF (99.8%) was spin-coated (4000 rpm, 30 s), followed by a heat-treatment at 100 °C for 2 min.

The starting MAPbI<sub>3</sub> films were deposited using the same one-step method. Here, a 40 wt% PbI<sub>2</sub>:MAI (molar ratio 1:1) solution in DMF (99.8%) was spin-coated (4000 rpm, 30 s), followed by a heat-treatment at 100 °C for 5 min.

A TiO<sub>2</sub> sol was prepared by mixing 10 mL titanium (IV) isopropoxide (99%) with 50 mL 2-methoxyethanol (98%) and 5 mL ethanolamine (99%) in a three-necked flask, each connected with a condenser, thermometer, and argon gas inlet/outlet. The mixed solution was heated to 80 °C for 2 h under magnetic stirring, followed by heating to 120 °C for 1 h. This two-step heating was then repeated two times to result in a viscous solution. The sol was spin-coated (4000 rpm, 30 s) on fluorine-doped tin oxide (FTO)-coated glass substrates, followed by a heat-treatment of 550 °C for 30 min in air, to deposit a 30-nm thick compact-TiO<sub>2</sub> layer.

**Solar Cell Fabrication:** FTO/glass substrates were patterned by etching with Zn powder and 1 M HCl diluted in distilled water. The etched substrates were then cleaned with ethanol, saturated KOH solution in isopropanol, and water sequentially, and then they were dried in clean dry air. A 30-nm compact-TiO<sub>2</sub> layer was deposited on top of the etched FTO/glass substrates using the procedure described earlier. A 300-nm mesoporous-TiO<sub>2</sub> layer was then deposited by spin-coating a dilute commercial TiO<sub>2</sub> paste (1:3 with ethanol by weight) at 3500 rpm for 30 s, followed by a sintering heat-treatment of 550 °C for 30 min in air. The NH<sub>4</sub>PbI<sub>3</sub> layer was then deposited using the one-step method, as described earlier. Then, these as-obtained films were put into the upper of the CVD tube furnace, while formamidine acetate (FA-Ac) was put on just below of the films. Then the tube was evacuated to under 10<sup>-2</sup> Pa, and at the same time heated up to 160 °C, and kept for 1h. A solution of spiro-MeOTAD (99%) hole-transporting material (HTM) coating was prepared by dissolving 72.3 mg spiro-MeOTAD in 1 mL chlorobenzene (99.8%), to which 28.8 μL 4-tert-butyl pyridine (96%) and 17.5 μL lithium bis(trifluoromethanesulfonyl)imide (LITSFI) solution (520 mg LITSFI (98%) in 1 mL acetonitrile

(99.8%) were added. The HTM was deposited by spin-coating (3000 rpm, 30 s). Finally, a 100 nm Ag electrode was thermally-evaporated to complete the solar cells. The cation exchange process based on MAPbI<sub>3</sub> and HPbI<sub>3</sub> was similar to that of the NH<sub>4</sub>PbI<sub>3</sub>. The HTM and the Ag layers were then deposited to complete the device assembly.

The preparation of MAPbI<sub>3</sub> by CVD method is as below: a 30 wt% PbI<sub>2</sub> solution in DMF (99.8%) was spin-coated (4000 rpm, 30 s) onto the mesoporous-TiO<sub>2</sub>. Then the as-obtained PbI<sub>2</sub> films were put into the upper of the CVD tube furnace, while CH<sub>3</sub>NH<sub>3</sub>I was put on just below of the films. The tube was evacuated to under 10<sup>-2</sup> Pa, at the same time heated up to 120 °C, and kept for 90 min.

J-V characteristics of the as-fabricated solar cells were measured using a 2400 Sourcemeeter (Keithley, USA) under simulated one-sun AM 1.5G 100 mW cm<sup>-2</sup> intensity (Oriel Sol3A Class AAA, Newport, USA), under both reverse (from V<sub>OC</sub> to J<sub>SC</sub>) and forward (from J<sub>SC</sub> to V<sub>OC</sub>) scans. The step voltage was 50 mV with a 10 ms delay time per step. The J output is converted to PCE output using the following relation: PCE = {J (mA cm<sup>-2</sup>) × V (V)}/(100 (mW cm<sup>-2</sup>)). A shutter was used to switch on and off the one-sun illumination on the devices. Typical active area of the devices is 0.09 cm<sup>2</sup> defined using non-reflective metal mask. The intensity of the one-sun AM 1.5G illumination was calibrated using a Si-reference cell certified by the National Renewable Energy Laboratory. All device testing was conducted in the ambient with a relative humidity of ~30%.

**Materials and Films Characterization.** IR spectra were recorded on a FT-IR spectrometer (Nicolet iS10, Thermo Fisher, USA) and only major peaks are reported in cm<sup>-1</sup>. XRD patterns were obtained using a X-ray diffractometer (D8 Advance, Bruker, Germany) using Cu Kα radiation, with 0.02° step and 2 s/step dwell. UV-vis absorption spectra of the films were recorded using spectrometer (U-4100, Hitachi, Japan). A field-emission SEM (S-4800, Hitachi, Japan) was used to observe the top surfaces and cross-sections. AFM measurements were performed in contact mode using AFM microscope (5400, Agilent, USA). All films for FTIR, XRD, SEM, AFM and UV-vis measurements were deposited on FTO/compact-TiO<sub>2</sub>/meso-TiO<sub>2</sub> for consistency.

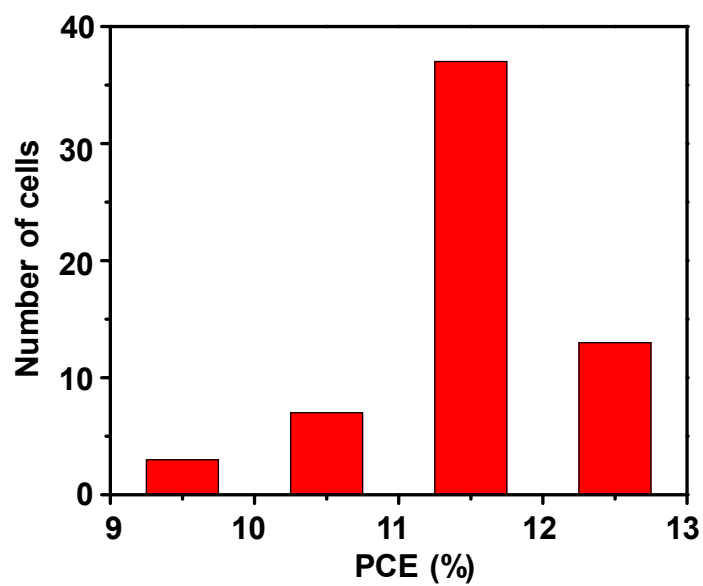

**Fig. S1** The distribution of PCEs for 60 cells.

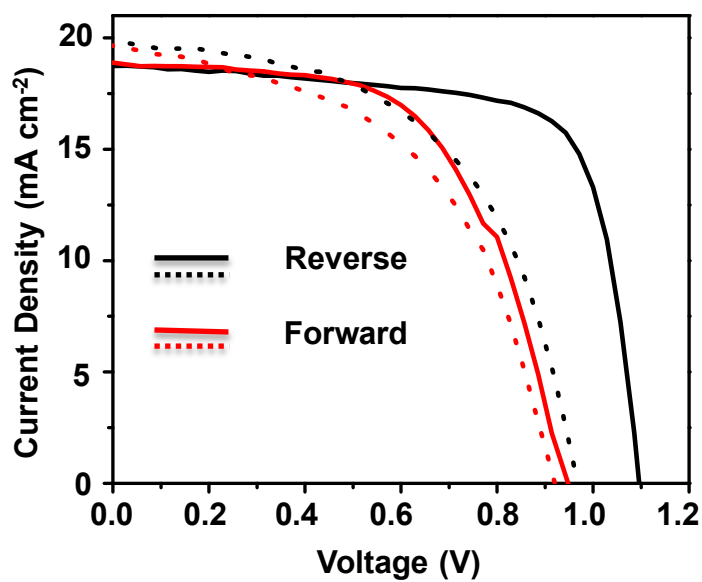

**Fig. S2** J–V characteristics measured under AM 1.5G solar irradiance (100 mWcm<sup>-2</sup>) for champion devices. Solid: MAPbI<sub>3</sub> obtained from CVD method. Dot: FAPbI<sub>3</sub> obtained via one-step spin coating from PbI<sub>2</sub>:PbCl<sub>2</sub>:4FAI solution<sup>S2</sup>.

**Table S1** Performance parameters of the devices based on (1,2) FAPbI<sub>3</sub> and (3) MAPbI<sub>3</sub> films fabricated with different methods. 1. FAPbI<sub>3</sub> film obtained from cation exchange method. 2. FAPbI<sub>3</sub> film obtained via one-step spin coating from PbI<sub>2</sub>:PbCl<sub>2</sub>:4FAIS<sup>2</sup>. 3. MAPbI<sub>3</sub> film obtained from traditional CVD method.

|   |      | J <sub>sc</sub> (mA/cm <sup>2</sup> ) | V <sub>oc</sub> (V) | FF   | η(%) |
|---|------|---------------------------------------|---------------------|------|------|
| 1 | Rev. | 22.2                                  | 0.94                | 0.59 | 12.4 |
| 1 | For. | 22.3                                  | 0.95                | 0.58 | 12.4 |
| 2 | Rev. | 19.7                                  | 0.97                | 54.4 | 10.4 |
| 2 | For. | 19.5                                  | 0.92                | 51.5 | 9.2  |
| 3 | Rev. | 18.7                                  | 1.10                | 72.4 | 14.8 |
| 3 | For. | 18.8                                  | 0.95                | 58.4 | 10.4 |

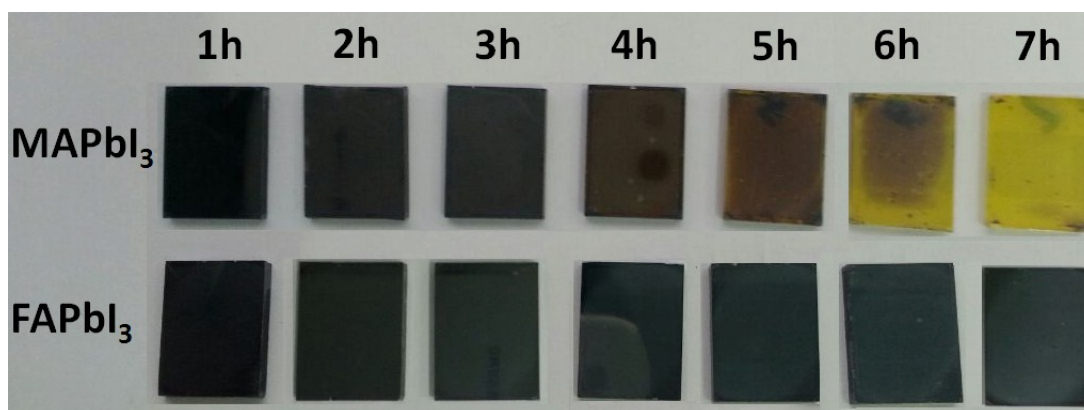

**Fig. S3** The optical pictures of MAPbI<sub>3</sub> and FAPbI<sub>3</sub> films heated at 140 °C in nitrogen-filled glove box for 1-7 h, respectively.

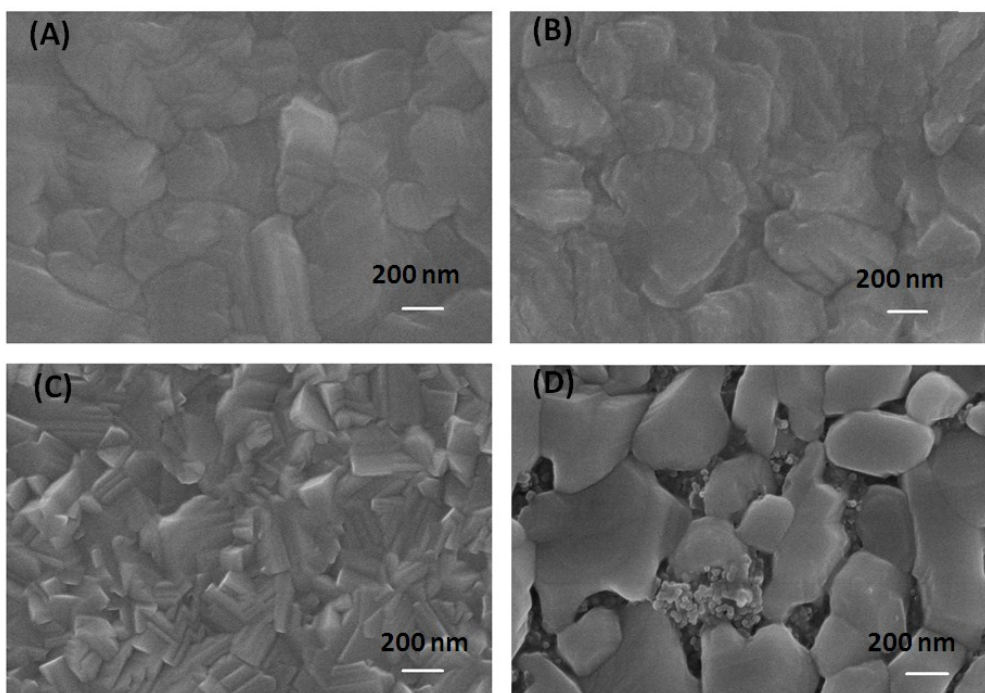

**Fig. S4** SEM images of pristine FAPbI<sub>3</sub> (A) and MAPbI<sub>3</sub> (C) films, FAPbI<sub>3</sub> (B) and MAPbI<sub>3</sub> (D) films heated at 140 °C for 7 h, respectively.

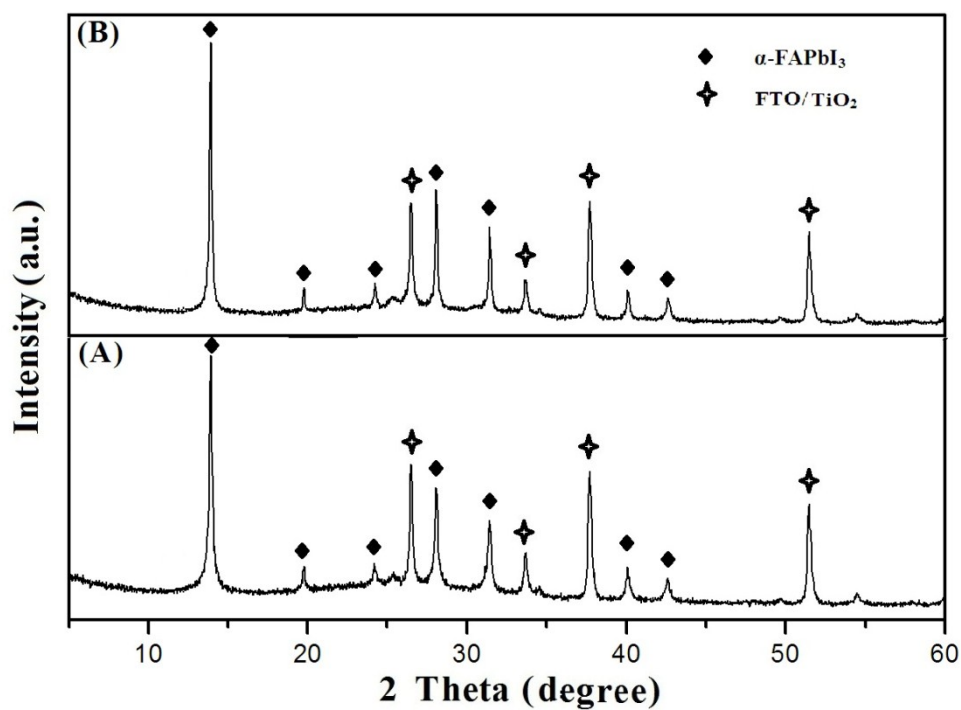

**Fig. S5** XRD patterns of FAPbI<sub>3</sub> films fabricated from MAPbI<sub>3</sub> (A) and HPbI<sub>3</sub> (B) starting films, respectively.

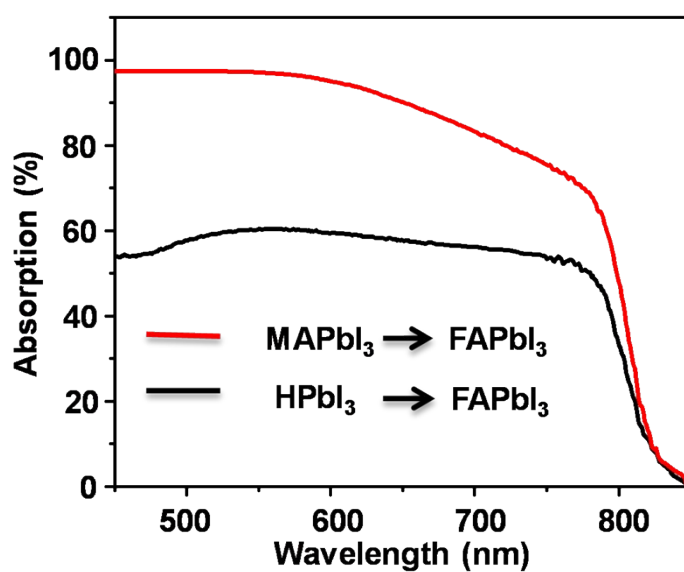

**Fig. S6** The absorption spectra of FAPbI<sub>3</sub> films prepared from HPbI<sub>3</sub> and MAPbI<sub>3</sub>, respectively, by the cation exchange method.

## References

- S1. M. M. Lee, J. Teuscher, T. Miyasaka, T. N. Murakami and H. J. Snaith, *Science*, 2012, **338**, 643-647.
- S2. D. Wang, Z. Liu, Z. Zhou, H. Zhu, Y. Zhou, C. Huang, Z. Wang, H. Xu, Y. Jin, B. Fan, S. Pang and G. Cui, *Chem. Mater.*, 2014, **26**, 7145–7150.
